# Supplementary material for: Multiple hybridized resonances of IR-806 chromonic molecules strongly coupled to Au nanorods
Source: Royal Society of Chemistry journal article supplement (doi:10.1039/c5nr00051c), 2015-01-01
Supplement: c5nr00051c1.pdf [file c5nr00051c1.pdf]

## Electronic Supplementary Information of

### “Multiple Hybridized Resonances of IR-806 Chromonic Molecules Strongly Coupled to Au Nanorods”

Ya-Fang Zhang,<sup>a,‡</sup> Da-Jie Yang,<sup>a,b,‡</sup> Jia-Hong Wang,<sup>a,‡</sup> Ya-Lan Wang,<sup>a</sup> Si-Jing Ding,<sup>a</sup>  
Li Zhou,<sup>a,\*</sup> Zhong-Hua Hao<sup>a,\*</sup> and Qu-Quan Wang<sup>a,b,\*</sup>

<sup>a</sup>Key Laboratory of Artificial Micro- and Nano-structures of the Ministry of Education, and School of Physics and Technology, Wuhan University, Wuhan, 430072, P. R. China;

<sup>b</sup>The Institute for Advanced Study, Wuhan University, Wuhan 430072, P. R. China.

Electronic mail: qqwang@whu.edu.cn; zhouli@whu.edu.cn; zh hao@whu.edu.cn

#### 1. Influence of PAH on the extinction spectrum of AuNRs

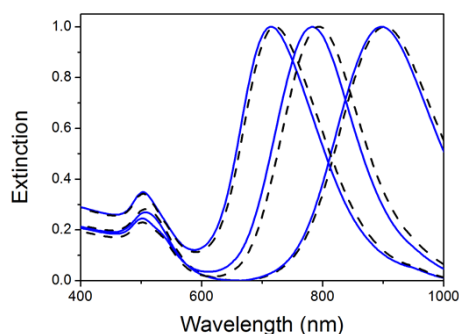

**Figure S1.** Normalized extinction spectra of AuNRs samples (black dashed lines) and the corresponding PAH-coated ones (blue solid lines).

## 2. The origin of hybrid peaks around 840 and 912 nm

Poly(sodium 4-styrenesulfonate) (PSS,  $M_w \approx 70,000$  g/mol) is anionic polyelectrolyte which is usually used to assemble AuNRs and dye molecules. When IR-806 with different concentrations was dissolved in the PSS solution (dissolved in 10 mM/L NaCl aqueous solution), the extinction spectra of IR-806 red shift a little comparing with the case of aqueous solution (Figure S2(a) and (b)). However, when IR-806 was dissolved in the PAH solution, the peak around 720 nm increases and the peaks at approximately 840 and 912 nm appear (Figure S2(c)). When IR-806 molecules are adsorbed onto the PAH-coated AuNRs, the result is similar while the peak at approximately 912 nm becomes obvious (Figure S2(d)). So we can conclude that assembly processes of IR-806 induced by PAH might happen and this produces the new assembly forms of IR-806 which is the origin of these two new peaks.

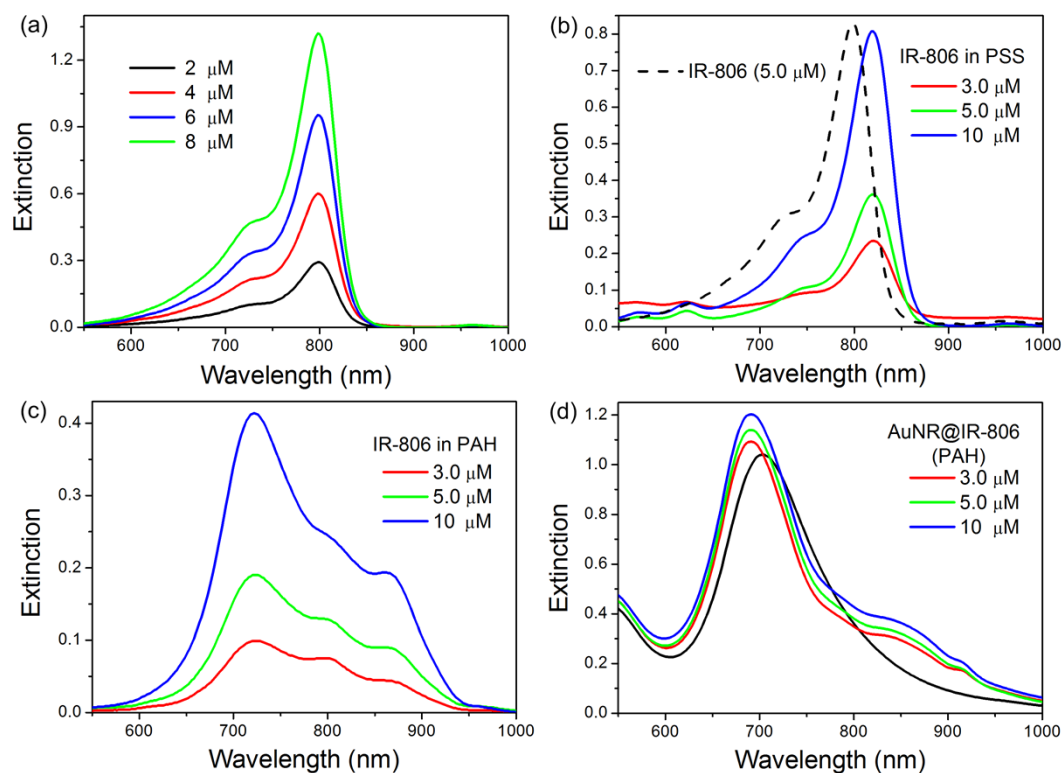

**Figure S2.** (a) Extinction spectra of IR-806 aqueous solutions with different concentrations. Extinction spectra of IR-806 with different concentrations dissolved in the 10 mg/mL (b) PSS solution and (c) PAH solution. (d) Extinction spectra of PAH-coated AuNRs interacting with IR-806 with different concentrations. The black line represents the PAH-coated AuNRs sample.

### 3. Dye concentration-dependent hybridized resonances of AuNR@IR-806 nano-complex with LSPR at 905 nm

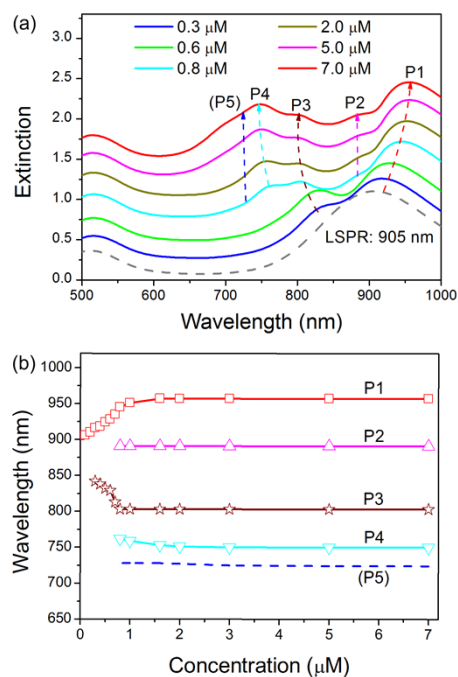

**Figure S3.** (a) Extinction spectra of bare AuNRs with LSPR at 905 nm (dashed line) and corresponding AuNR@IR-806 hybrids with various dye concentrations (solid lines). The dye concentrations are 0, 0.3, 0.6, 0.8, 2.0, 5.0, and 7.0  $\mu\text{M}$  from bottom to top, respectively. The peaks are obtained by fitting their extinction spectra with Gaussian peaks. (b) The Gaussian peak positions of the hybrids versus the dye concentration.

#### 4. Dye concentration-dependent hybridized resonances of AuNR@IR-806 nano-complex with LSPR at 727 nm

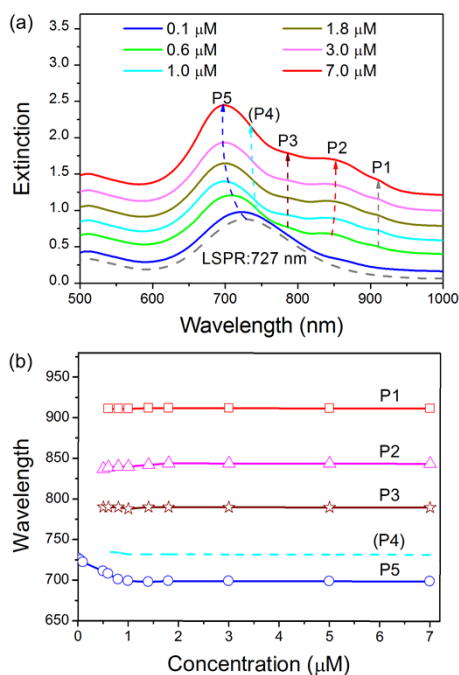

**Figure S4.** (a) Extinction spectra of bare AuNRs with LSPR at 727 nm (dashed line) and corresponding AuNR@IR-806 hybrids with various dye concentrations (solid lines). The dye concentrations are 0, 0.1, 0.6, 1.0, 1.8, 3.0, and 7.0  $\mu\text{M}$  from bottom to top, respectively. The peaks are obtained by fitting their extinction spectra with Gaussian peaks. (b) The Gaussian peak positions of the hybrids versus the dye concentration.
